# Supplementary material for: Ablation of PPARγ in subcutaneous fat exacerbates age‐associated obesity and metabolic decline
Source: PubMed Central journal article supplement (PMC5847881; doi:10.1111/acel.12721), 2018-01-31
Supplement: ACEL-17-e12721-s004.pdf [file ACEL-17-e12721-s004.pdf]

**Supplemental Table S1. Adipogenesis PCR-array results.**

| Gene   | Young  | Aging  | Gene     | Young | Aging  |
|--------|--------|--------|----------|-------|--------|
| Wnt1   | 3.08** | 0.52** | Gata3    | 1.05  | 0.54** |
| Nrob2  | 3.07** | 1.12   | Ppara    | 1.02  | 0.67*  |
| Vdr    | 2.52** | 0.42** | Foxc2    | 1.01  | 0.65*  |
| Wnt3a  | 2.09** | 0.45** | Ppargc1b | 1.01  | 0.81   |
| Dkk1   | 1.64*  | 0.58*  | Runx1t1  | 0.98  | 0.81   |
| Dlk1   | 1.63*  | 0.48*  | Bmp4     | 0.95  | 0.81   |
| Src    | 1.58*  | 0.69*  | Prdm16   | 0.93  | 0.67*  |
| E2f1   | 1.55   | 0.57*  | Ucp1     | 0.91  | 0.39** |
| Ccnd1  | 1.50   | 1.05   | Axin1    | 0.91  | 0.65*  |
| Shh    | 1.42   | 0.85   | Adrb2    | 0.91  | 0.93   |
| Bmp2   | 1.34   | 0.60*  | Fgfl     | 0.90  | 0.67*  |
| Egr2   | 1.32   | 0.76   | Cdkn1a   | 0.89  | 1.30   |
| Wnt5b  | 1.22   | 0.47** | Wnt5a    | 0.86  | 1.01   |
| Bmp7   | 1.23   | 1.09   | Acacb    | 0.86  | 0.87   |
| Sirt3  | 1.22   | 0.38** | Mapk14   | 0.85  | 0.86   |
| Dio2   | 1.17   | 0.29** | Creb1    | 0.79  | 0.49** |
| Wnt10b | 1.14   | 1.04   | Hes1     | 0.79  | 0.76   |
| Angpt2 | 1.08   | 0.89   | Cebpd    | 0.78  | 0.79   |
| Nrf1   | 1.05   | 0.78   | Sfrp1    | 0.78  | 0.51** |
| Ncoa2  | 1.05   | 0.91   | Ppard    | 0.75  | 0.92   |

| Gene     | Young  | Aging  | Gene    | Young  | Aging  |
|----------|--------|--------|---------|--------|--------|
| Gata2    | 0.73   | 0.43** | Jun     | 0.45** | 0.75   |
| Cebpb    | 0.72   | 0.90   | Ncor2   | 0.44** | 1.01   |
| Klf2     | 0.68*  | 0.66*  | Fabp4   | 0.41** | 1.12   |
| Nr1h3    | 0.65*  | 0.91   | Sirt2   | 0.41** | 0.97   |
| Lrp5     | 0.67*  | 1.44   | Adipoq  | 0.38** | 1.26   |
| Cdkn1b   | 0.64*  | 1.13   | Sirt1   | 0.36** | 0.53** |
| Ppargc1a | 0.63*  | 0.72*  | Adig    | 0.32** | 1.23   |
| Rxra     | 0.61** | 1.01   | Cfd     | 0.30** | 1.21   |
| Cdk4     | 0.58*  | 1.21   | Cebpa   | 0.30** | 1.18   |
| Ddit3    | 0.57** | 0.95   | Klf15   | 0.28** | 0.77   |
| Lmna     | 0.56*  | 0.92   | Lpl     | 0.28** | 1.30   |
| Tcf7l2   | 0.56*  | 1.12   | Pparg   | 0.28** | 0.27** |
| Klf4     | 0.56** | 1.21   | Klf3    | 0.27** | 0.95   |
| Rb1      | 0.54** | 1.07   | Fasn    | 0.26** | 1.09   |
| Twist1   | 0.54** | 1.42   | Slc2a4  | 0.23** | 0.91   |
| Fgf2     | 0.54** | 0.84   | Srebf1  | 0.21** | 1.13   |
| Irs2     | 0.50** | 1.03   | Irs1    | 0.19** | 1.03   |
| Insr     | 0.49** | 0.98   | Lep     | 0.17** | 0.95   |
| Foxo1    | 0.49** | 1.09   | Tsc22d3 | 0.15** | 0.87   |
| Taz      | 0.48** | 1.40   | Sfrp5   | 0.13** | 0.56*  |

| Gene  | Young  | Aging |
|-------|--------|-------|
| Lipe  | 0.13** | 0.92  |
| Retn  | 0.10** | 0.84  |
| Fgf10 | 0.08** | 1.34  |
| Agt   | 0.07** | 0.84  |

PCR-arrays (Qiagen, PAMM049Z) were used to determine fold change of relative gene expressions in subcutaneous fat with adenoviral delivery of shPPAR $\gamma$  vs shCon in young (2-month-old) and aging (12-month-old) mice. \*, P<0.05; \*\*, P<0.01 and n=3 per group.
