# Supplementary material for: Ablation of PPARγ in subcutaneous fat exacerbates age‐associated obesity and metabolic decline
Source: PubMed Central journal article supplement (PMC5847881; doi:10.1111/acel.12721), 2018-01-31
Supplement: ACEL-17-e12721-s005.pdf [file ACEL-17-e12721-s005.pdf]

**Supplemental Table S2. The sequences of primers used in Real-Time PCR.**

| Primer         | Forward Primer 5'-3'        | Reverse Primer 5'-3'         |
|----------------|-----------------------------|------------------------------|
| m36B4          | GCTTCATTGTGGGAGCAGAC        | ATGGTGTTCTTGCCCATCAG         |
| mPgc1 $\alpha$ | ACCATGACTACTGTCAGTCAC<br>TC | GTCACAGGAGGCATCTTTGA<br>AG   |
| mUcp1          | GGCCCTTGTAACAACAAAA<br>TAC  | GGCAACAAGAGCTGACAGT<br>AAAT  |
| mPrdm16        | CCACCAGCGAGGACTTCAC         | GGAGGACTCTCGTAGCTCGA<br>A    |
| mCidea         | TGACATTCATGGGATTGCAGA<br>C  | CGAGCTGGATGTATGAGGGG         |
| mElov13        | TTCTCACGCGGGTTAAAAATG<br>G  | TCTCGAAGTCATAGGGTTGC<br>AT   |
| maP2           | ACACCGAGATTTCTTCAAA<br>CTG  | CCATCTAGGGTTATGATGCTC<br>TTC |
| mCd36          | TTTGGAGTGGTAGTAAAAAG<br>GGC | TGACATCAGGGACTCAGAGT<br>AG   |
| mPerilipin     | CTGTGTGCAATGCCTATGAGA       | CTGGAGGGTATTGAAGAGCC<br>G    |
| mPpar $\gamma$ | TCCAGCATTCTGCTCCACA         | ACAGACTCGGCACTCAATGG         |
| mAgt           | TCTCCTTTACCACAACAAGA<br>GCA | CTTCTCATTACAGGGGAGG<br>T     |

|         |                             |                            |
|---------|-----------------------------|----------------------------|
| mRetn   | ACAAGACTTCAACTCCCTGT<br>TTC | TTTCTTCACGAATGTCCCACG      |
| mSlc2a4 | GTGACTGGAACACTGGTCCT<br>A   | CCAGCCACGTTGCATTGTAG       |
| mCfd    | CATGCTCGGCCCTACATGG         | CACAGAGTCGTCATCCGTC<br>C   |
| mAdipoq | TGTTCTCTTAATCCTGCCCA        | CCAACCTGCACAAGTTCCT<br>T   |
| mSirt3  | ATCCCGGACTTCAGATCCCC        | CAACATGAAAAGGGCTTGG<br>G   |
| mDio2   | AATTATGCCTCGGAGAAGAC<br>CG  | GGCAGTTGCCTAGTGAAAGG<br>T  |
| mPpara  | AGAGCCCCATCTGTCCTCTC        | ACTGGTAGTCTGCAAAACCA<br>AA |
| mFasn   | GGAGGTGGTGATAGCCGGTA<br>T   | TGGGTAATCCATAGAGCCCA<br>G  |
| mLpl    | GGGAGTTTGGCTCCAGAGTT<br>T   | TGTGTCTTCAGGGGTCCTTA<br>G  |
